# Supplementary material for: Microphthalmia-Associated Transcription Factor: A Differentiation Marker in Uveal Melanoma
Source: MDPI journal article supplement (doi:10.3390/ijms24108861), 2023-05-16
Supplement: s1 [file s1]

**Supplementary Table S2:** top 5 upregulated and top 5 downregulated genes in UM with low MITF vs UM with high MITF in the Leiden cohort.

|                            | Symbol  | Entrez | logFC    | AveExpr  | t        | P.Value  | adj.P.Val | B        | Location | Description                                        |
|----------------------------|---------|--------|----------|----------|----------|----------|-----------|----------|----------|----------------------------------------------------|
| Upregulated in MITF loss   | CXCL16  | 58191  | 0.741486 | 8.413755 | 4.460757 | 3.36E-05 | 0.009452  | 2.205388 | 17p13.2  | C-X-C motif chemokine ligand 16                    |
|                            | RMDN1   | 51115  | 0.649212 | 8.273728 | 4.421381 | 3.86E-05 | 0.010057  | 2.079305 | 8q21.3   | Regulator of microtubule dynamics 1                |
|                            | HAVCR2  | 84868  | 0.792435 | 8.250183 | 4.331454 | 5.3E-05  | 0.011966  | 1.793475 | 5q33.3   | Hepatitis A virus cellular receptor 2 (TIM3)       |
|                            | CNIH4   | 29097  | 0.642492 | 10.1966  | 4.321953 | 5.48E-05 | 0.011966  | 1.763453 | 1q42.11  | Cornichon family AMPA receptor auxiliary protein 4 |
|                            | HCP5    | 10866  | 1.551341 | 9.148227 | 4.133257 | 0.000106 | 0.014577  | 1.174445 | 6p21.33  | HLA complex P5                                     |
| Downregulated in MITF loss | IRS2    | 8660   | -0.70351 | 9.537433 | -7.10912 | 1.17E-09 | 1.89E-05  | 11.48943 | 13q34    | Insulin receptor substrate 2                       |
|                            | AHCYL2  | 23382  | -1.18313 | 9.329294 | -5.44432 | 8.71E-07 | 0.001646  | 5.507751 | 7q32.1   | Adenosylhomocysteinase like 2                      |
|                            | PPP1R3C | 5507   | -1.20628 | 8.913484 | -4.65239 | 1.69E-05 | 0.006196  | 2.826651 | 10q23.32 | Protein phosphatase 1 regulatory subunit 3c        |
|                            | SNHG7   | 84973  | -0.92191 | 11.95    | -4.28843 | 6.16E-05 | 0.012044  | 1.657804 | 9q34.3   | small nucleolar RNA host gene 7                    |
|                            | CDV3    | 55573  | -0.60191 | 8.652244 | -4.22338 | 7.73E-05 | 0.012546  | 1.454012 | 3q22.1   | CDV3 homolog                                       |
