# Supplementary material for: Microphthalmia-Associated Transcription Factor: A Differentiation Marker in Uveal Melanoma
Source: MDPI journal article supplement (doi:10.3390/ijms24108861), 2023-05-16
Supplement: s1 [file s1]

**Supplementary Table S3:** list of Illumina probes used for each gene examined (HT-12 v4 chip)..

| GENE       | PROBE        |
|------------|--------------|
| MITF       | ILMN_2304186 |
| MC1R       | ILMN_1653319 |
| MLANA      | ILMN_1710217 |
| PMEL       | ILMN_1665994 |
| TYR        | ILMN_1788774 |
| TYRP1      | ILMN_2054652 |
| Rab27a pr1 | ILMN_2329773 |
| Rab27a pr3 | ILMN_1665859 |
| OA1        | ILMN_1756261 |
| SOX10      | ILMN_1653750 |
| SNAI2 pr1  | ILMN_1655740 |
| SNAI2 pr2  | ILMN_2082585 |
| ZEB2       | ILMN_1688698 |
| TWIST1     | ILMN_1672908 |
| STAT3 pr1  | ILMN_1663618 |
| STAT3 pr2  | ILMN_2401978 |
| CD3D       | ILMN_2261416 |
| CD3E       | ILMN_1739794 |
| CD4        | ILMN_1727284 |
| CD8A pr1   | ILMN_1768482 |
| CD8A pr3   | ILMN_2353732 |
| CD68       | ILMN_1714861 |
| CD163      | ILMN_1733270 |
| HLA-A pr1  | ILMN_1671054 |
| HLA-A pr2  | ILMN_2203950 |
| HLA-A pr4  | ILMN_2186806 |
| HLA-B      | ILMN_1778401 |
| HLA-DR pr1 | ILMN_1689655 |
| HLA-DR pr2 | ILMN_2157441 |
