# Supplementary material for: Microphthalmia-Associated Transcription Factor: A Differentiation Marker in Uveal Melanoma
Source: MDPI journal article supplement (doi:10.3390/ijms24108861), 2023-05-16
Supplement: s1 [file s1]

**Supplementary Table S1.** Correlations between expression of MITF and cytokines in 64 UM patients from the Leiden cohort (microarray). Spearman's correlation. MITF expression (Mean,  $\pm$  SD) = 10.46 ( $\pm$ 0.5)

|          | <i>Mean (<math>\pm</math>SD)</i> | Correlation Coeff. | Sig (2-tailed) |
|----------|----------------------------------|--------------------|----------------|
| CCL2     | 7.37 ( $\pm$ 0.7)                | -0.119             | 0.35           |
| CCL5 pr1 | 7.53 ( $\pm$ 1.2)                | -0.371             | 0.003          |
| CCL5 pr2 | 8.52 ( $\pm$ 1.5)                | -0.328             | 0.008          |
| CXCL10   | 7.36 ( $\pm$ 1.0)                | -0.267             | 0.033          |
| IL10     | 9.56 ( $\pm$ 0.6)                | -0.105             | 0.41           |
